# Supplementary material
Source: publisher figshare collection journal article supplement (https://acs.figshare.com/ndownloader/files/11216834)
Supplement: Supplementary file 1 [file 11216834]

## Supporting Information

*Reduction of Charge Traps and Stability Enhancement in Solution-Processed Organic Field-Effect Transistors Based on a Blended n-type Semiconductor*

*Antonio Campos,<sup>†</sup> Sergi Riera-Galindo,<sup>†</sup> Joaquim Puigdollers,<sup>‡</sup> and Marta Mas-Torrent<sup>†\*</sup>*

<sup>†</sup> Institut de Ciència de Materials de Barcelona (ICMAB-CSIC) and Networking Research Center on Bioengineering, Biomaterials and Nanomedicine (CIBER-BBN), Campus UAB, Cerdanyola del Vallès, 08193 Barcelona, Spain. E-mail: mmas@icmab.es

<sup>‡</sup> Dept. Enginyeria Electrònica, Universitat Politècnica de Catalunya, Jordi Girona 1-3, 08034, Barcelona, Spain

## **CONTENT**

**Figure S1. Crossed-polarized optical microscope images.**

**Figure S2. X-ray diffractograms.**

**Figure S3. AFM images used to extract film thickness’.**

**Figure S4. ToF-SIMS graph of PDI8CN2/PS.**

**Table S1. Main transistors parameters of the tested formulations.**

**Figure S5. Output characteristics a PDI8CN2/PS film.**

**Figure S6. Output characteristics a PDI8CN2 film.**

**Table S2. Main transistors parameters extracted from the bias stress stability measurement.**

**Figure S7. Bias stress stability of PDI8CN2 film encapsulated with Cytop**

**Figure S8. Activation energy PDI8CN2 OFET.**

**Figure S9. Activation energy PDI8CN2/PS OFET.**

**Figure S10. Inverter layout and optical microscope images.**

**Figure S11. DB-TTF/PS OFET transfer characteristic.**

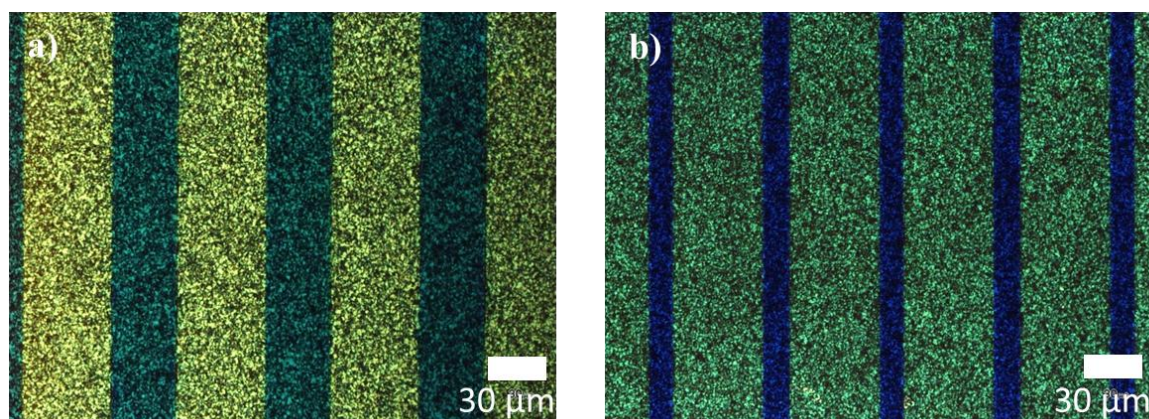

**Figure S1.** Cross polarized optical microscope images of (a) PDI8CN2 and (b) PDI8CN2/PS films.

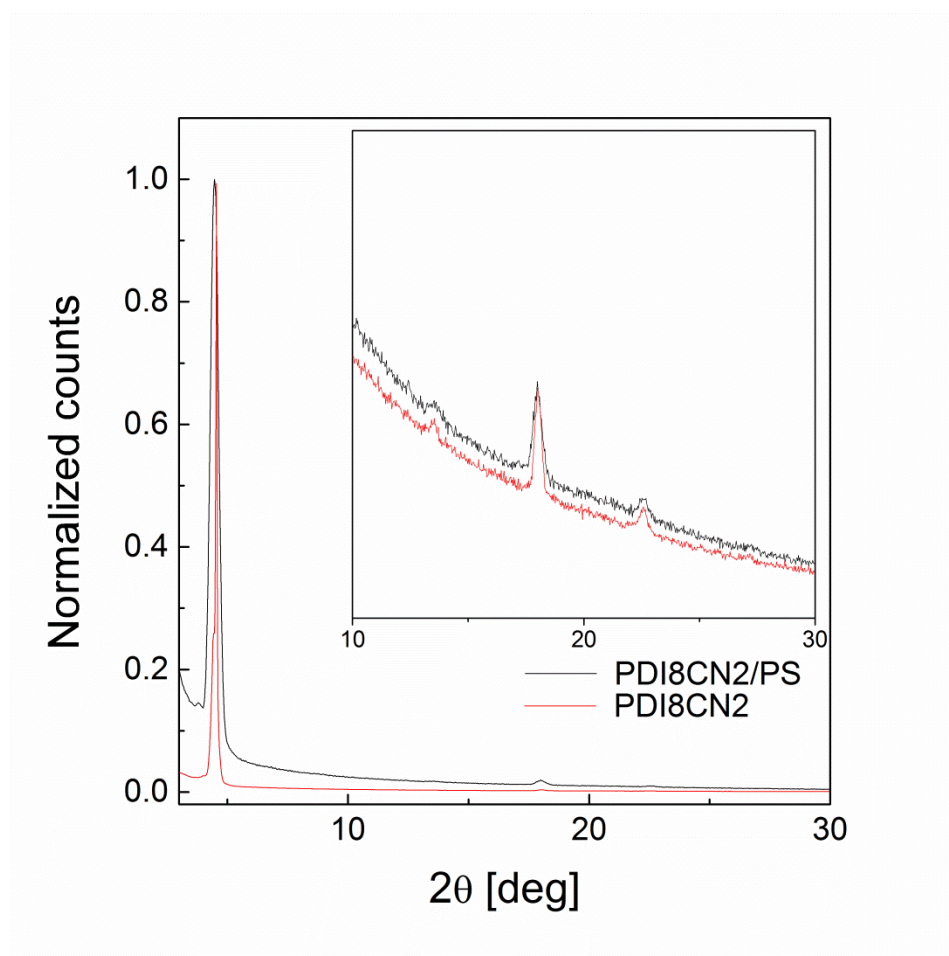

**Figure S2.** XRD of PDI8CN2 and PDI8CN2/PS films.

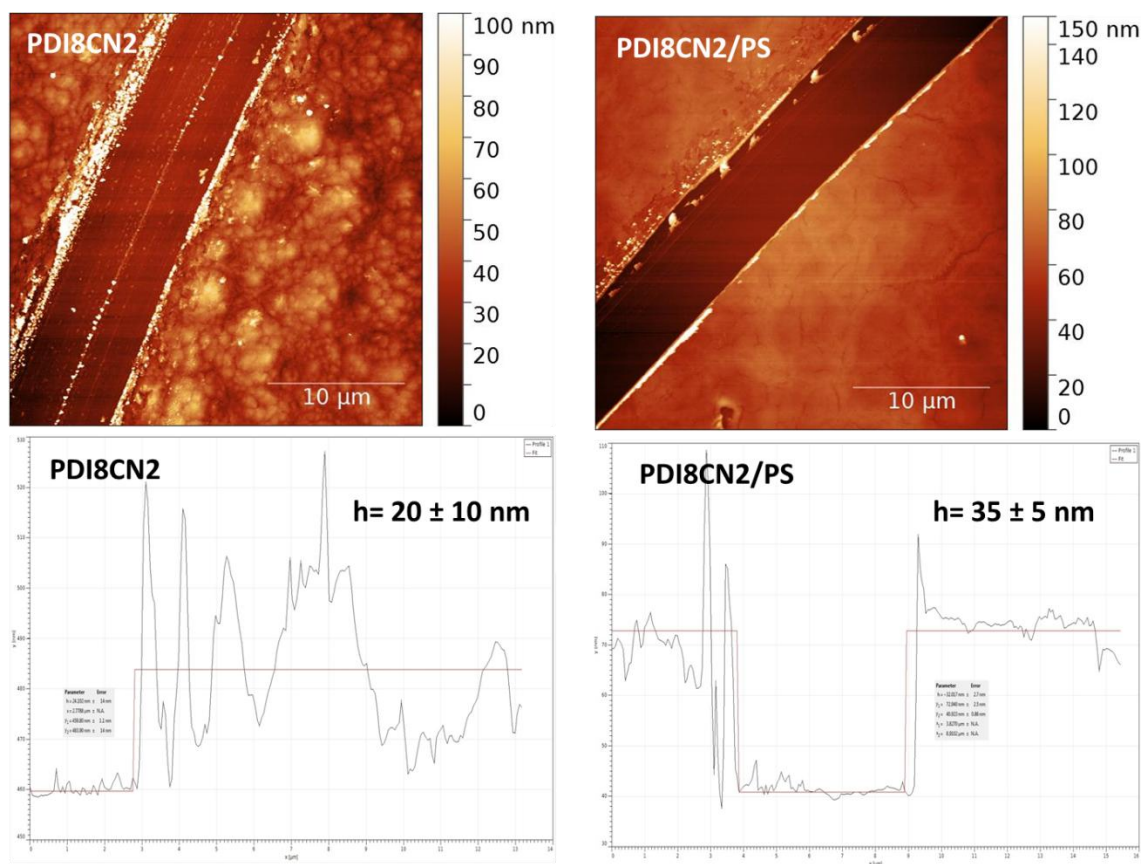

**Figure S3.** On the top, AFM images showing the scratch where the film thickness was measured and, on the bottom, the profile that were used to extract the thickness.

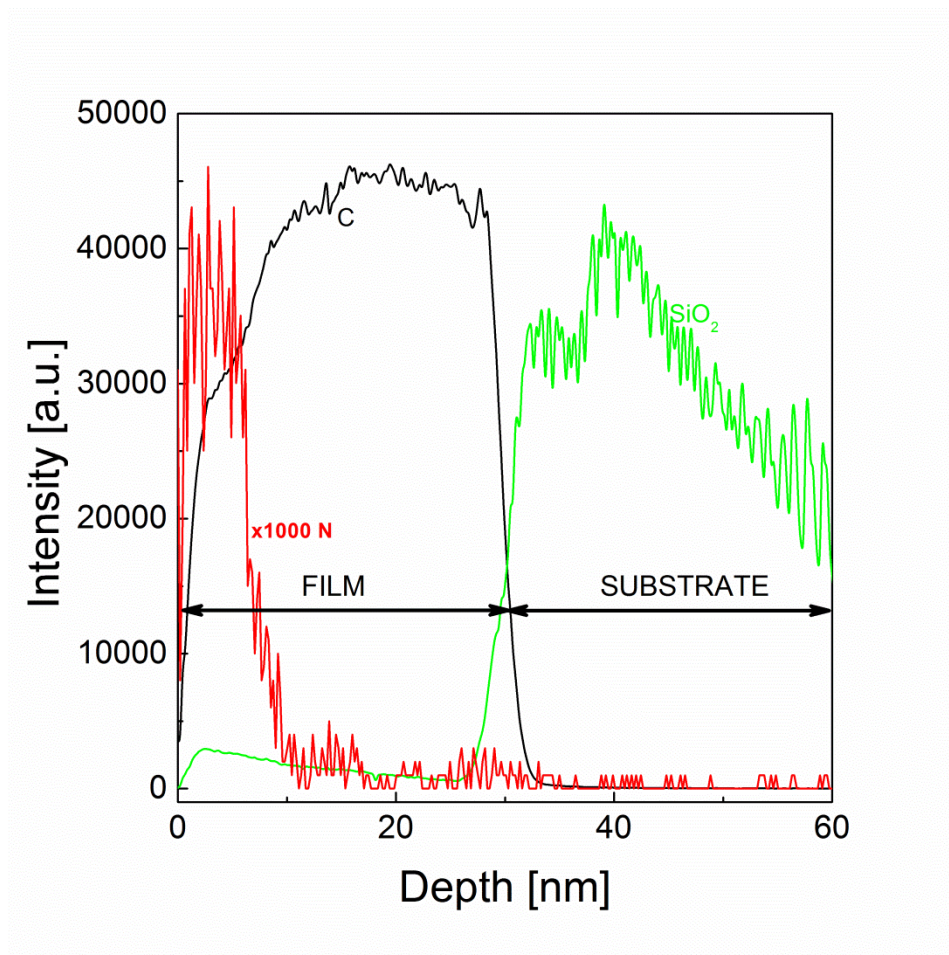

**Figure S4.** ToF-SIMS graph of the PDI8CN2/PS film. This graph confirms that there is a vertical phase separation with a PDI8CN2 top layer and a thicker PS layer underneath. The signal of the N has been increased x1000 so the phase separation can be observed.



**Table S1.** Mobility and threshold voltage values of the formulation tested to find the optimized film.

| OSC/Polymer (Molecular weight) Ratio             | $\mu_{\text{FE,sat}} [\text{cm}^2/\text{V}\cdot\text{s}]$ | $V_{\text{TH}} [\text{V}]$ |
|--------------------------------------------------|-----------------------------------------------------------|----------------------------|
| <b>Pristine PDI8CN2</b>                          | $(5.5 \pm 0.5) \cdot 10^{-3}$                             | $-8.4 \pm 1.2$             |
| <b>PDI8CN2/PMMA (120k) 4:1</b>                   | $(1.3 \pm 0.1) \cdot 10^{-2}$                             | $-7.2 \pm 1.1$             |
| <b>PDI8CN2/PMMA (120k) 1:1</b>                   | $(1.1 \pm 0.1) \cdot 10^{-2}$                             | $-9.3 \pm 1.0$             |
| <b>PDI8CN2/P<math>\alpha</math>MS (100k) 4:1</b> | $(8.4 \pm 2.1) \cdot 10^{-3}$                             | $-15.6 \pm 3.8$            |
| <b>PDI8CN2/P<math>\alpha</math>MS (100k) 1:1</b> | $(4.6 \pm 0.4) \cdot 10^{-2}$                             | $-8.8 \pm 0.9$             |
| <b>PDI8CN2/PS (280k) 4:1</b>                     | $(1.9 \pm 0.3) \cdot 10^{-2}$                             | $-4.3 \pm 0.4$             |
| <b>PDI8CN2/PS (280k) 1:1</b>                     | $(2.4 \pm 0.3) \cdot 10^{-2}$                             | $-1.5 \pm 0.2$             |
| <b>PDI8CN2/PS (280k) 1:2</b>                     | $(2.8 \pm 0.3) \cdot 10^{-2}$                             | $-0.9 \pm 0.1$             |

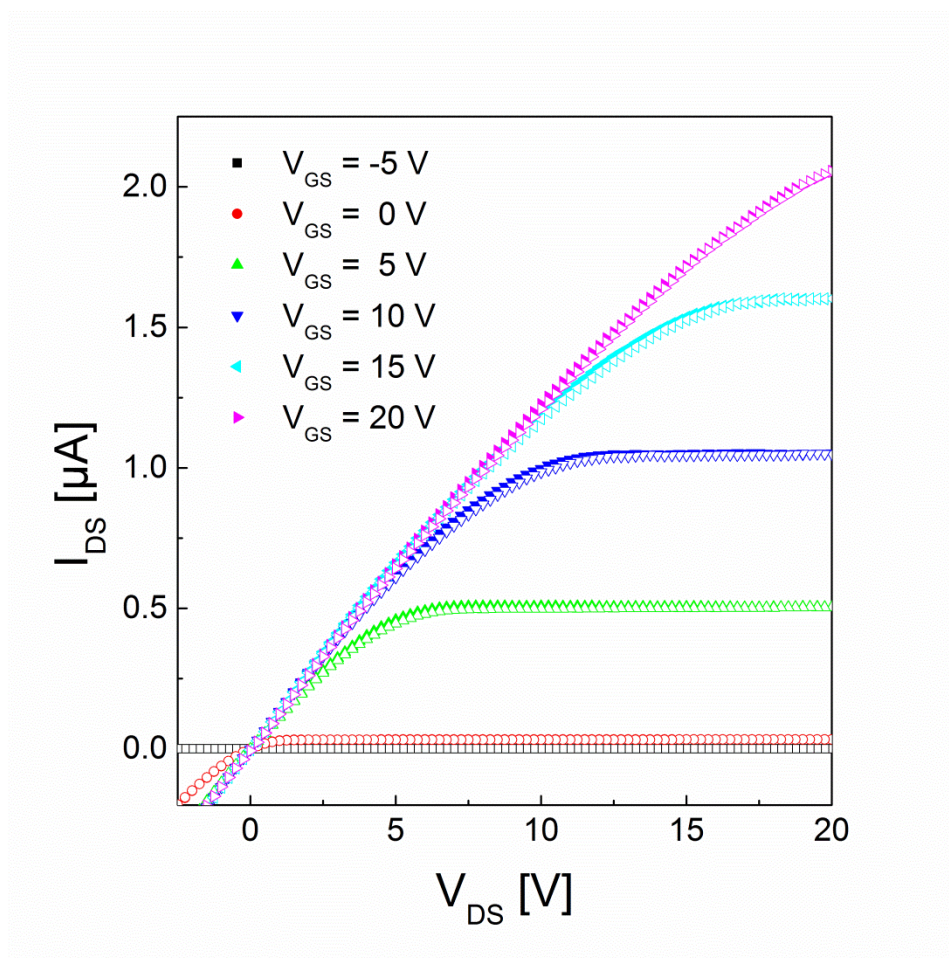

**Figure S5.** Output characteristic of a PDI8CN2/PS device.

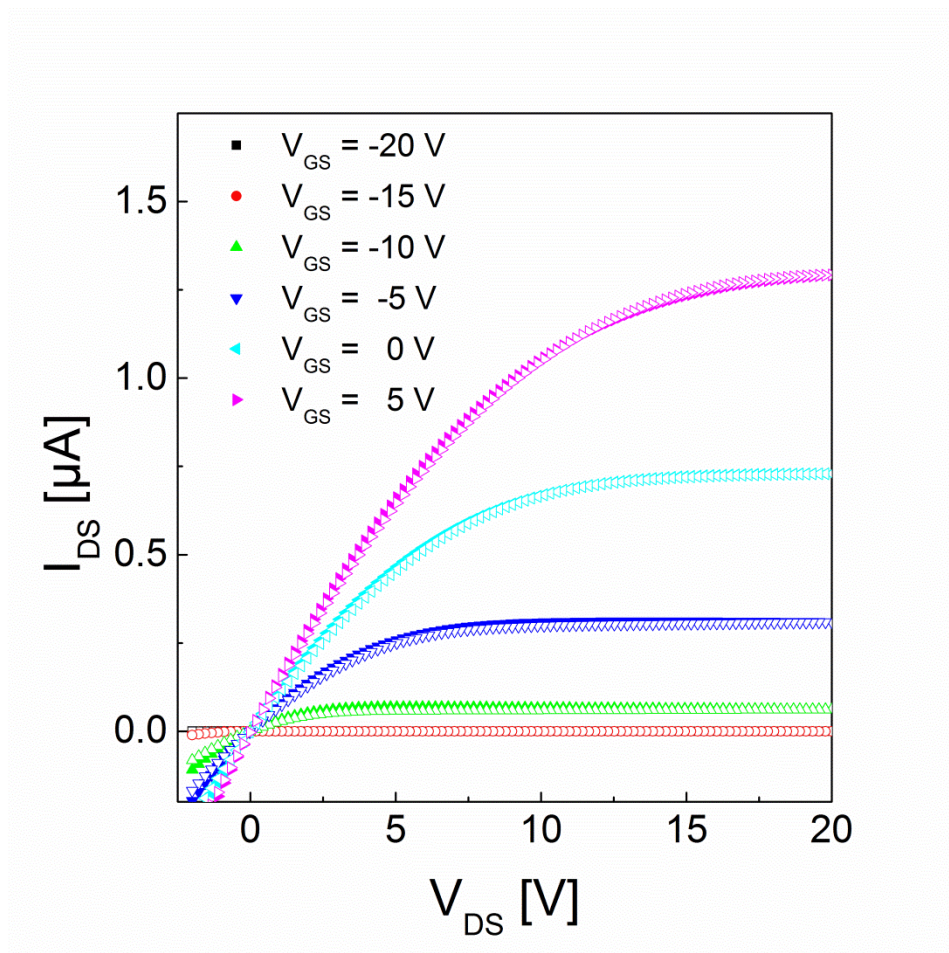

**Figure S6.** Output characteristics of a PDI8CN2 device.

**Table S2.** Field-effect mobility and threshold voltage values of PDI8CN2 and PDI8CN2/PS films in the bias stress stability test.

| PDI8CN2 |                                                               |                            | PDI8CN2/PS |                                                               |                            |
|---------|---------------------------------------------------------------|----------------------------|------------|---------------------------------------------------------------|----------------------------|
| t [min] | $\mu \cdot 10^{-3} [\text{cm}^2 \text{V}^{-1} \text{s}^{-1}]$ | $V_{\text{TH}} [\text{V}]$ | t [min]    | $\mu \cdot 10^{-2} [\text{cm}^2 \text{V}^{-1} \text{s}^{-1}]$ | $V_{\text{TH}} [\text{V}]$ |
| 0       | 6.01                                                          | -5.5                       | 0          | 2.27                                                          | -0.2                       |
| 15      | 4.06                                                          | 2.6                        | 15         | 2.54                                                          | 2.7                        |
| 30      | 3.69                                                          | 6.5                        | 30         | 2.21                                                          | 3.5                        |
| 45      | 3.43                                                          | 9.0                        | 45         | 2.05                                                          | 4.0                        |
| 60      | 3.34                                                          | 11.0                       | 60         | 1.93                                                          | 4.4                        |
| 90      | 3.04                                                          | 14.0                       | 75         | 1.78                                                          | 4.7                        |
| 120     | 2.75                                                          | 15.9                       | 90         | 1.70                                                          | 4.9                        |
| 150     | 2.56                                                          | 17.1                       | 105        | 1.64                                                          | 5.1                        |
| 180     | 2.33                                                          | 17.9                       | 120        | 1.61                                                          | 5.4                        |
| 210     | 2.43                                                          | 18.4                       | 135        | 1.56                                                          | 5.5                        |
| 240     | 2.89                                                          | 18.9                       | 150        | 1.56                                                          | 5.6                        |
| 270     | 3.70                                                          | 19.5                       | 165        | 1.53                                                          | 5.8                        |
| 300     | 3.88                                                          | 19.5                       | 180        | 1.48                                                          | 5.8                        |
|         |                                                               |                            | 195        | 1.45                                                          | 6.0                        |
|         |                                                               |                            | 210        | 1.40                                                          | 6.1                        |
|         |                                                               |                            | 225        | 1.35                                                          | 6.2                        |
|         |                                                               |                            | 240        | 1.33                                                          | 6.3                        |
|         |                                                               |                            | 300        | 1.14                                                          | 6.4                        |
|         |                                                               |                            | 360        | 1.07                                                          | 6.6                        |
|         |                                                               |                            | 420        | 0.89                                                          | 6.7                        |
|         |                                                               |                            | 480        | 0.87                                                          | 7.0                        |
|         |                                                               |                            | 540        | 0.78                                                          | 7.1                        |
|         |                                                               |                            | 600        | 0.73                                                          | 7.2                        |
|         |                                                               |                            | 660        | 0.66                                                          | 7.4                        |
|         |                                                               |                            | 720        | 0.60                                                          | 7.5                        |



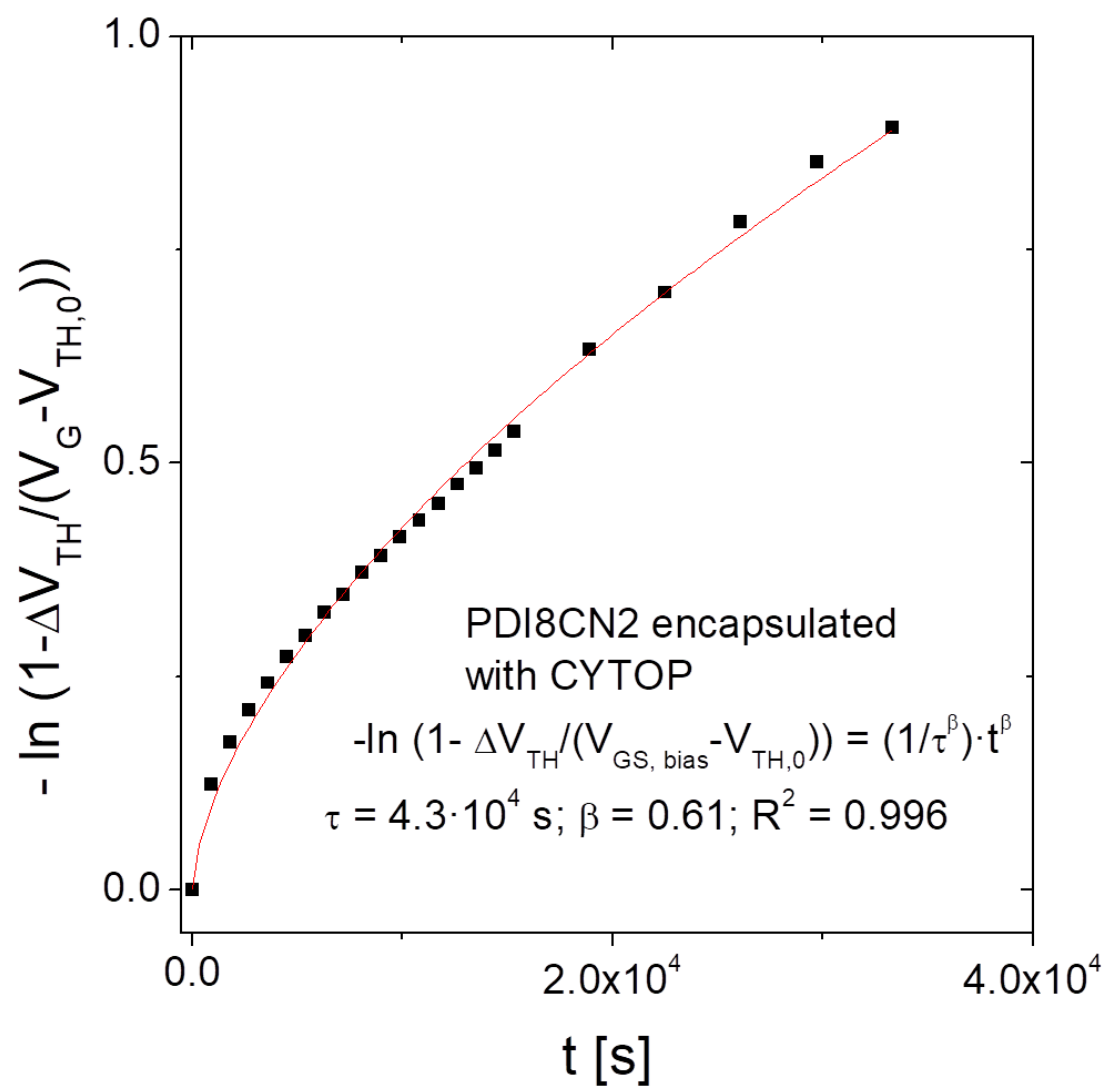

**Figure S7.** Bias stress stability of a film of PDI8CN2 encapsulated with Cytop.

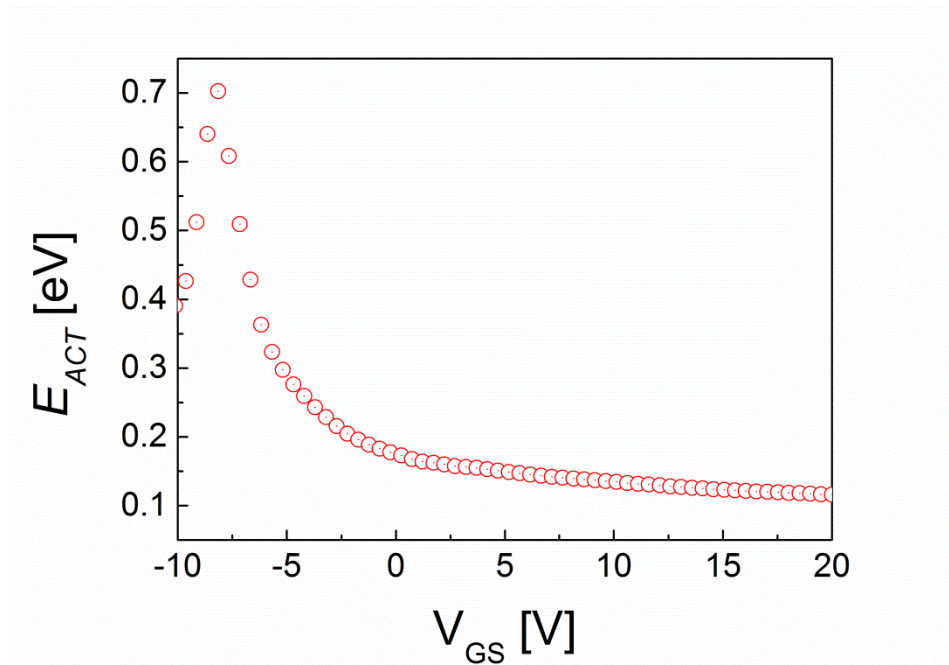

**Figure S8.** Activation energy of a PDI8CN2 device vs.  $V_{GS}$ .

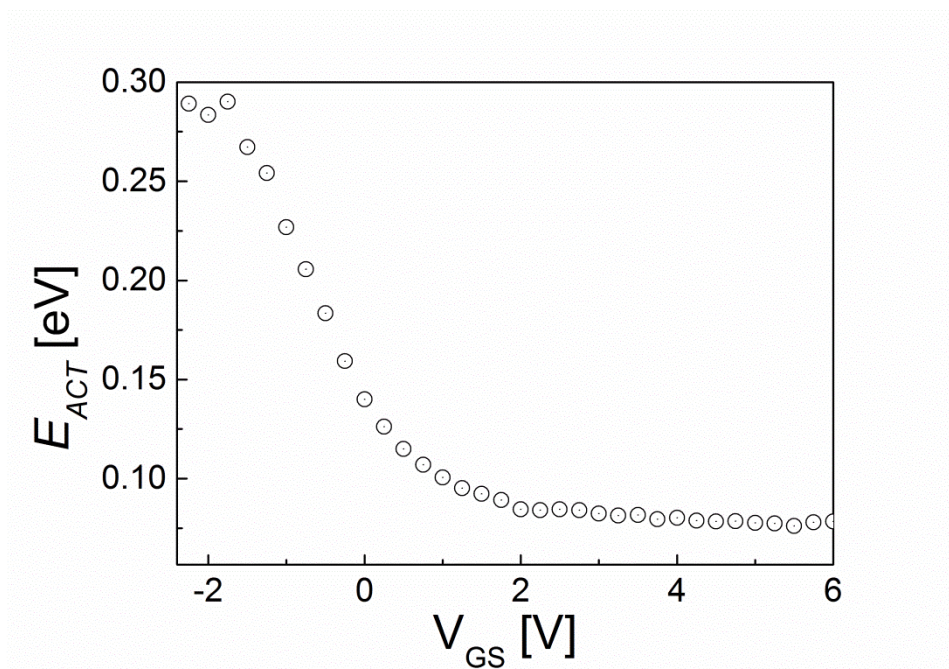

**Figure S9.** Activation energy of a PDI8CN2/PS device vs  $V_{GS}$ .

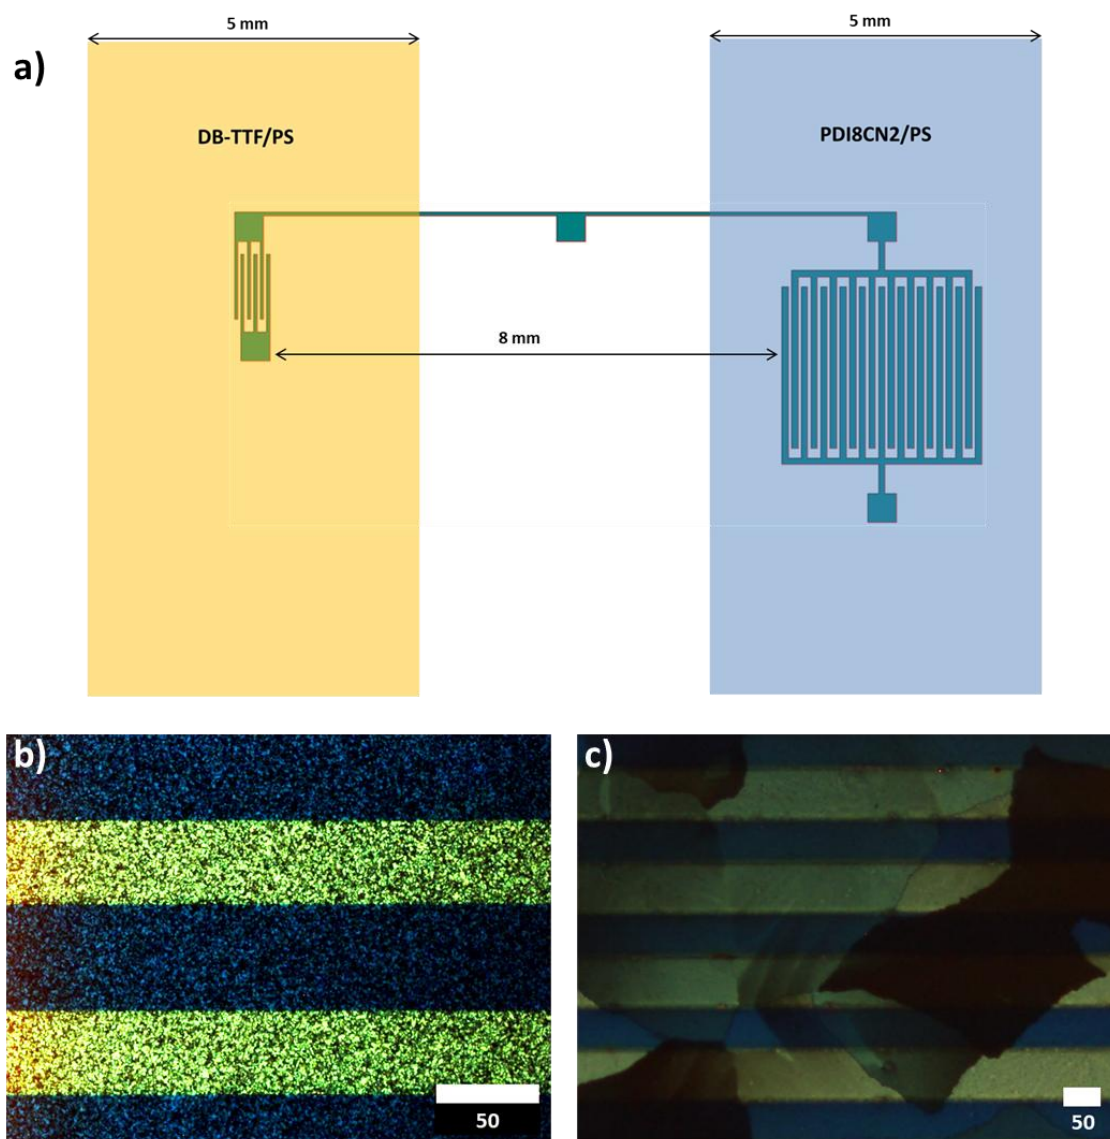

**Figure S10.** a) Schematic representation of the inverter layout. Polarized optical microscope images of (b) a PDI8CN2/PS film and (c) DB-TTF/PS film. The scale bar corresponds to 50 μm.

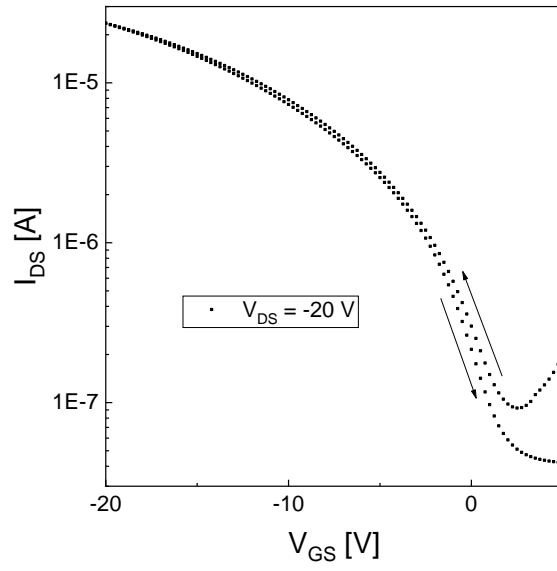

**Figure S11.** DB-TTF/PS OFET transfer characteristics.
